# Supplementary material
Source: publisher figshare collection journal article supplement (https://geolsoc.figshare.com/ndownloader/files/22107009)
Supplement: Supplementary file 1 [file 22107009]

## Sheet: S1. Hydrocarbon IF and CA
Supplementary Table 1. Hydrocarbon IFT and CA literature values used for Figure 8. Data from indicated studies filtered to only include datapoints applicable to geological conditions (25-35 C°/km geothermal gradient). All data from literature except for pseudo-depth, calculated assuming 10 Mpa/km hydrostatic pressure gradient.
Hydrocarbon type	Temperature C	Pressure Mpa	Pseudo-depth (km)	IFT mN/m	Reference
methane	200	50	5	40.6	Jennings et al. 1971
methane	200	60	6	39.9	Jennings et al. 1971
methane	100	20.8571	2.08571	48	Kashefi, 2012
methane	150	37.9592	3.79592	39.9	Kashefi, 2012
methane	150	47.7891	4.77891	39.5	Kashefi, 2012
methane	60	20	2	53.01	Ren et al., 2000
methane	60	20	2	53.01	Ren et al., 2000
methane	80	20	2	51.7	Ren et al., 2000
methane	80	20	2	51.7	Ren et al., 2000
methane	100	20	2	49.83	Ren et al., 2000
methane	100	20	2	49.83	Ren et al., 2000
methane	80	30	3	48.59	Ren et al., 2000
methane	80	30	3	48.59	Ren et al., 2000
methane	100	30	3	47.75	Ren et al., 2000
methane	100	30	3	47.75	Ren et al., 2000
methane	100	20	2	49.97	Tian et al. 1997
methane	100	20	2	49.07	Wiegand et al. 1994
crude at bubblepoint	87.2	26.06	2.606	25.1	Firoozabadi and Ramey, 1988
crude at bubblepoint	88.9	27.92	2.792	26.4	Firoozabadi and Ramey, 1988
crude at bubblepoint	84.1	26.89	2.689	28.5	Firoozabadi and Ramey, 1988
crude at bubblepoint	88.9	28.54	2.854	28.6	Firoozabadi and Ramey, 1988
crude at bubblepoint	88.9	27.65	2.765	29.2	Firoozabadi and Ramey, 1988
crude at bubblepoint	88.9	27.65	2.765	29.4	Firoozabadi and Ramey, 1988
crude at bubblepoint	86.1	22.52	2.252	32.8	Firoozabadi and Ramey, 1988
crude at bubblepoint	93.3	34.19	3.419	34.1	Firoozabadi and Ramey, 1988
crude at bubblepoint	85	33.03	3.303	34.2	Firoozabadi and Ramey, 1988
crude at bubblepoint	82.2	23.38	2.338	36.4	Firoozabadi and Ramey, 1988
crude at bubblepoint	90.6	29.03	2.903	39.4	Firoozabadi and Ramey, 1988
crude at bubblepoint	98.3	27.92	2.792	40.2	Firoozabadi and Ramey, 1988
crude oil above bubble point	87.2	34.47	3.447	25.3	Firoozabadi and Ramey, 1988
crude oil above bubble point	88.9	34.47	3.447	26.2	Firoozabadi and Ramey, 1988
crude oil above bubble point	84.1	34.47	3.447	28.4	Firoozabadi and Ramey, 1988
crude oil above bubble point	88.9	34.58	3.458	28.6	Firoozabadi and Ramey, 1988
crude oil above bubble point	88.9	34.47	3.447	28.7	Firoozabadi and Ramey, 1988
crude oil above bubble point	88.9	34.58	3.458	29.2	Firoozabadi and Ramey, 1988
crude oil above bubble point	71.1	28.27	2.827	30.2	Firoozabadi and Ramey, 1988
crude oil above bubble point	86.1	34.47	3.447	31.5	Firoozabadi and Ramey, 1988
crude oil above bubble point	66.1	28.2	2.82	31.8	Firoozabadi and Ramey, 1988
crude oil above bubble point	93.3	37.92	3.792	32.5	Firoozabadi and Ramey, 1988
crude oil above bubble point	104.4	34.47	3.447	33.4	Firoozabadi and Ramey, 1988
crude oil above bubble point	85	34.47	3.447	34	Firoozabadi and Ramey, 1988
crude oil above bubble point	82.2	34.47	3.447	34.4	Firoozabadi and Ramey, 1988
crude oil above bubble point	90.6	37.92	3.792	39.5	Firoozabadi and Ramey, 1988
crude oil above bubble point	98.3	34.47	3.447	41.6	Firoozabadi and Ramey, 1988
stock oil	90	26.2	2.62	31	Hjelmeland and Larrondo, 1986
live oil	88.6	26.2	2.62	33	Hjelmeland and Larrondo, 1986
stock oil	88.6	26.2	2.62	33.6	Hjelmeland and Larrondo, 1986
stock oil	88.6	26.2	2.62	35	Hjelmeland and Larrondo, 1986

## Sheet: S2. CO2 IFT and CA
Supplementary Table 2.CO2 IFT and CA literature values used for Figure 8 and experimental conditions. Data from indicated studies filtered to only include datapoints applicable to geological conditions (25-35 C°/km geothermal gradient). All data from literature except for pseudo-depth, calculated assuming 10 Mpa/km hydrostatic pressure gradient.
Fluid type	Wetting phase	Wetting phase density g/cm3	Wetting phase salinity g/L	Pressure MPa	Temperature C	CO2 density g/cm3	Interfacial tension mN/m	Density difference g/cm3	Salt type	Pseudo-depth	Reference
CO2	brine		334.01	17.4	60		42	0	Na,K, Ca, Mg, Cl,SO4, HCO3	1.74	Bachu and Bennion (2009)
CO2	brine		144.3	17.4	60		30.4	0	Na,K, Ca, Mg, Cl,SO4, HCO3	1.74	Bachu and Bennion (2009)
CO2	brine		334.01	17.4	75		44.7	0	Na,K, Ca, Mg, Cl,SO4, HCO3	1.74	Bachu and Bennion (2009)
CO2	brine		144.3	17.4	75		33.1	0	Na,K, Ca, Mg, Cl,SO4, HCO3	1.74	Bachu and Bennion (2009)
CO2	brine		75.75	17.4	75		31.9	0	Na,K, Ca, Mg, Cl,SO4, HCO3	1.74	Bachu and Bennion (2009)
CO2	brine		225.46	17.4	75		37.5	0	Na,K, Ca, Mg, Cl,SO4, HCO3	1.74	Bachu and Bennion (2009)
CO2	brine		282.77	17.4	75		41.3	0	Na,K, Ca, Mg, Cl,SO4, HCO3	1.74	Bachu and Bennion (2009)
CO2	brine		334.01	27	75		40.1	0	Na,K, Ca, Mg, Cl,SO4, HCO3	2.7	Bachu and Bennion (2009)
CO2	brine		144.3	27	75		31.7	0	Na,K, Ca, Mg, Cl,SO4, HCO3	2.7	Bachu and Bennion (2009)
CO2	brine		75.75	27	75		30.5	0	Na,K, Ca, Mg, Cl,SO4, HCO3	2.7	Bachu and Bennion (2009)
CO2	brine		225.46	27	75		34.5	0	Na,K, Ca, Mg, Cl,SO4, HCO3	2.7	Bachu and Bennion (2009)
CO2	brine		282.77	27	75		38.9	0	Na,K, Ca, Mg, Cl,SO4, HCO3	2.7	Bachu and Bennion (2009)
CO2	brine		334.01	27	100		41.1	0	Na,K, Ca, Mg, Cl,SO4, HCO3	2.7	Bachu and Bennion (2009)
CO2	brine		144.3	27	100		34.2	0	Na,K, Ca, Mg, Cl,SO4, HCO3	2.7	Bachu and Bennion (2009)
CO2	brine	1.0517	103.82	15.1	71	0.50142	30.04	0.55028	NaCl	1.51	Chalbaud et al., 2009
CO2	brine	1.0251	50.46	16.67	71	0.56352	27.74	0.46158	NaCl	1.667	Chalbaud et al., 2009
CO2	brine	1.0794	159.5	17.45	71	0.58879	29.19	0.49061	NaCl	1.745	Chalbaud et al., 2009
CO2	brine	1.0208	4.93	17.5	71	0.5905	26.52	0.4303	NaCl	1.75	Chalbaud et al., 2009
CO2	brine	1.053	103.82	17.55	71	0.59192	29.25	0.46108	NaCl	1.755	Chalbaud et al., 2009
CO2	brine	1.0268	50.46	19.72	71	0.64657	28.18	0.38023	NaCl	1.972	Chalbaud et al., 2009
CO2	brine	1.0542	103.82	20.1	71	0.65445	29.04	0.39975	NaCl	2.01	Chalbaud et al., 2009
CO2	brine	1.0807	159.5	20.47	71	0.66191	29.95	0.41879	NaCl	2.047	Chalbaud et al., 2009
CO2	brine	1.0225	4.93	20.7	71	0.66684	26.78	0.35566	NaCl	2.07	Chalbaud et al., 2009
CO2	brine	1.0282	50.46	22.51	71	0.69725	27.59	0.33095	NaCl	2.251	Chalbaud et al., 2009
CO2	brine	1.0555	103.82	22.55	71	0.69803	29.69	0.35747	NaCl	2.255	Chalbaud et al., 2009
CO2	brine	1.0808	159.5	23.2	71	0.70776	29.96	0.37304	NaCl	2.32	Chalbaud et al., 2009
CO2	brine	0.9838	4.93	23.6	100	0.56247	26.03	0.42133	NaCl	2.36	Chalbaud et al., 2009
CO2	brine	1.0243	4.93	24.27	71	0.72255	24.78	0.30175	NaCl	2.427	Chalbaud et al., 2009
CO2	brine	1.0564	103.82	24.6	71	0.72684	28.67	0.32956	NaCl	2.46	Chalbaud et al., 2009
CO2	brine	1.0345	103.82	25.4	100	0.59536	27.65	0.43914	NaCl	2.54	Chalbaud et al., 2009
CO2	brine	1.0111	50.46	25.8	100	0.60223	25.97	0.40887	NaCl	2.58	Chalbaud et al., 2009
CO2	water	0.9996	0	15	50.45	0.6915	32.6	0.3081		1.5	Chiquet et al., 2007
CO2	water	0.9865	0	15	69.85	0.4841	32.5	0.5024		1.5	Chiquet et al., 2007
CO2	water	0.9904	0	20	69.95	0.6454	27.5	0.345		2	Chiquet et al., 2007
CO2	water	0.9899	0	25	70.55	0.7271	25	0.2628		2.5	Chiquet et al., 2007
CO2	water	0.9836	0	25	90.05	0.6238	27.6	0.3598		2.5	Chiquet et al., 2007
CO2	water	0.986	0	30	90.45	0.6933	25.9	0.2927		3	Chiquet et al., 2007
CO2	water	0.9744	0	30	110.45	0.6228	25.5	0.3516		3	Chiquet et al., 2007
CO2	water	0.9775	0	40	109.75	0.7277	23.4	0.2498		4	Chiquet et al., 2007
CO2	purified deionized water			15.01	60.35		30.47	0.388		1.501	Georgiadis et al., 2010
CO2	purified deionized water			15.09	70.15		30.31	0.476		1.509	Georgiadis et al., 2010
CO2	purified deionized water			20	60.35		29.07	0.27		2	Georgiadis et al., 2010
CO2	purified deionized water			20.2	70.15		28.36	0.324		2.02	Georgiadis et al., 2010
CO2	purified deionized water			30	101.15		25.27	0.314		3	Georgiadis et al., 2010
